# Supplementary material for: Centrifugation does not remove bacteria from the fat fraction of human milk
Source: PubMed Central journal article supplement (PMC7804008; doi:10.1038/s41598-020-79793-y), 2021-01-12
Supplement: 41598_2020_79793_MOESM1_ESM.pdf [file 41598_2020_79793_MOESM1_ESM.pdf]

# Centrifugation does not remove bacteria from the fat fraction of human milk

Lisa F. Stinson<sup>1\*</sup>, Jie Ma<sup>1\*</sup>, Alethea Rea<sup>2</sup>, Michael Dymock<sup>3</sup>, and Donna T. Geddes<sup>1</sup>

<sup>1</sup> School of Molecular Sciences, The University of Western Australia, Perth, Australia

<sup>2</sup> Mathematics and Statistics, Murdoch University, Perth, Australia

<sup>3</sup> Centre for Applied Statistics, The University of Western Australia, Perth, Australia

**Supplementary table 1:** Relative abundance of bacterial species in different human milk fractions (fat or cell pellet).

| Species                                   | 148  |        | 176   |        | 194   |        | 224   |        | 227   |        | 247   |        | 260   |        | 262   |        | 271   |        | 278   |        |
|-------------------------------------------|------|--------|-------|--------|-------|--------|-------|--------|-------|--------|-------|--------|-------|--------|-------|--------|-------|--------|-------|--------|
|                                           | Fat  | Pellet | Fat   | Pellet | Fat   | Pellet | Fat   | Pellet | Fat   | Pellet | Fat   | Pellet | Fat   | Pellet | Fat   | Pellet | Fat   | Pellet | Fat   | Pellet |
| <i>Acinetobacter lwoffii</i>              | 0.00 | 0.00   | 0.00  | 0.00   | 0.00  | 0.00   | 0.00  | 7.95   | 0.00  | 0.00   | 0.00  | 0.00   | 0.00  | 0.00   | 0.00  | 0.00   | 0.00  | 0.00   | 0.00  | 0.00   |
| <i>Anaerococcus lactolyticus</i>          | 0.00 | 0.00   | 0.00  | 0.00   | 0.24  | 24.24  | 0.00  | 0.00   | 0.00  | 0.00   | 0.00  | 0.00   | 0.00  | 0.00   | 0.00  | 0.00   | 0.00  | 0.00   | 0.00  | 0.00   |
| <i>Anaerococcus octavius</i>              | 2.41 | 0.00   | 0.00  | 0.00   | 0.00  | 0.00   | 0.00  | 0.00   | 0.00  | 0.00   | 0.00  | 0.00   | 0.00  | 0.07   | 0.00  | 0.00   | 0.00  | 0.00   | 0.00  | 0.00   |
| <i>Corynebacterium kroppenstedtii</i>     | 0.00 | 0.37   | 0.00  | 0.00   | 0.00  | 0.00   | 0.00  | 0.00   | 0.00  | 0.00   | 0.00  | 0.00   | 0.48  | 0.34   | 4.98  | 0.06   | 0.43  | 0.57   | 0.12  | 0.23   |
| <i>Corynebacterium renale</i>             | 0.00 | 0.00   | 0.00  | 0.00   | 0.00  | 0.00   | 0.00  | 0.00   | 0.00  | 0.00   | 0.00  | 0.00   | 0.00  | 0.00   | 0.00  | 0.00   | 0.00  | 0.00   | 0.35  | 0.98   |
| <i>Corynebacterium tuberculostearicum</i> | 0.00 | 0.01   | 0.05  | 0.07   | 0.00  | 0.00   | 9.39  | 0.55   | 0.00  | 0.00   | 0.00  | 0.23   | 0.00  | 0.81   | 0.00  | 0.01   | 0.00  | 0.00   | 0.00  | 0.00   |
| <i>Dolosigranulum pigrum</i>              | 0.90 | 0.16   | 0.00  | 0.00   | 0.00  | 0.00   | 0.00  | 0.00   | 0.00  | 0.09   | 0.00  | 0.00   | 0.00  | 0.00   | 0.00  | 0.00   | 0.00  | 0.00   | 0.00  | 0.00   |
| <i>Gemella taiwanensis</i>                | 0.00 | 0.52   | 0.00  | 0.00   | 0.00  | 0.00   | 2.24  | 0.00   | 0.00  | 0.38   | 0.00  | 0.00   | 0.00  | 0.27   | 0.00  | 0.00   | 0.04  | 0.17   | 0.00  | 0.00   |
| <i>Haemophilus parainfluenzae</i>         | 0.00 | 0.00   | 0.00  | 0.00   | 0.00  | 0.00   | 0.00  | 0.00   | 0.00  | 0.00   | 1.92  | 1.30   | 0.00  | 0.00   | 0.00  | 0.00   | 0.00  | 0.00   | 0.00  | 0.07   |
| <i>Mucilaginibacter daejeonensis</i>      | 0.00 | 0.00   | 0.00  | 0.00   | 0.00  | 0.00   | 21.95 | 0.00   | 0.00  | 0.00   | 0.00  | 0.00   | 0.00  | 0.00   | 0.00  | 0.00   | 0.00  | 0.00   | 0.00  | 0.00   |
| <i>Pelomonas puraquae</i>                 | 2.13 | 0.03   | 0.05  | 0.00   | 24.70 | 0.00   | 0.87  | 1.26   | 3.56  | 0.06   | 0.05  | 0.00   | 2.09  | 0.03   | 0.57  | 0.04   | 0.43  | 0.03   | 0.73  | 0.03   |
| <i>Propionibacterium acnes</i>            | 5.61 | 9.33   | 0.05  | 0.02   | 0.24  | 9.84   | 0.00  | 0.00   | 0.00  | 1.97   | 0.00  | 0.00   | 0.00  | 1.02   | 70.01 | 70.68  | 0.00  | 0.11   | 0.00  | 0.03   |
| <i>Ralstonia syzygii</i>                  | 0.28 | 0.04   | 0.00  | 0.02   | 2.18  | 0.00   | 0.22  | 0.39   | 0.30  | 0.03   | 0.02  | 0.00   | 0.08  | 0.00   | 0.00  | 0.04   | 0.17  | 0.06   | 0.15  | 0.01   |
| <i>Rothia endophytica</i>                 | 0.00 | 0.00   | 0.03  | 0.00   | 54.96 | 0.00   | 0.00  | 0.00   | 0.00  | 0.00   | 0.00  | 0.00   | 0.62  | 0.17   | 0.00  | 0.00   | 0.00  | 0.00   | 0.00  | 0.00   |
| <i>Rothia mucilaginosa</i>                | 1.62 | 1.61   | 0.00  | 0.00   | 0.00  | 0.00   | 0.00  | 0.00   | 0.00  | 0.00   | 0.02  | 0.00   | 0.00  | 0.00   | 0.00  | 0.40   | 2.50  | 3.26   | 0.00  | 0.31   |
| <i>Staphylococcus capitis</i>             | 0.00 | 0.05   | 0.32  | 0.70   | 0.00  | 0.00   | 0.00  | 0.16   | 0.10  | 0.53   | 0.09  | 0.07   | 0.00  | 0.07   | 0.06  | 0.13   | 0.34  | 0.37   | 0.13  | 0.21   |
| <i>Staphylococcus caprae</i>              | 0.04 | 0.08   | 0.75  | 1.05   | 0.00  | 0.00   | 0.00  | 0.24   | 0.20  | 0.31   | 0.02  | 0.18   | 0.05  | 0.10   | 0.11  | 0.21   | 0.30  | 0.43   | 0.25  | 0.41   |
| <i>Staphylococcus epidermidis</i>         | 0.60 | 1.44   | 34.82 | 41.13  | 16.71 | 64.40  | 0.00  | 12.52  | 90.42 | 78.06  | 96.44 | 96.48  | 86.90 | 93.43  | 20.94 | 19.47  | 28.67 | 25.23  | 22.35 | 26.62  |

|                                       |       |       |       |       |      |      |       |       |      |      |      |      |      |      |      |      |       |       |       |       |
|---------------------------------------|-------|-------|-------|-------|------|------|-------|-------|------|------|------|------|------|------|------|------|-------|-------|-------|-------|
| <i>Staphylococcus rostri</i>          | 0.00  | 0.01  | 0.13  | 0.09  | 0.24 | 1.29 | 0.00  | 0.08  | 1.28 | 0.41 | 0.23 | 0.23 | 0.51 | 0.41 | 0.23 | 0.09 | 0.22  | 0.14  | 0.21  | 0.15  |
| <i>Streptococcus lactarius</i>        | 0.00  | 0.00  | 0.00  | 0.00  | 0.00 | 0.00 | 14.66 | 3.39  | 0.00 | 3.50 | 0.00 | 0.00 | 0.00 | 0.00 | 0.00 | 0.00 | 0.00  | 0.00  | 0.00  | 0.00  |
| <i>Streptococcus parasanguinis</i>    | 86.31 | 86.04 | 0.00  | 0.00  | 0.48 | 0.12 | 0.00  | 1.10  | 0.00 | 0.03 | 0.05 | 0.00 | 0.03 | 0.30 | 0.00 | 0.24 | 7.83  | 7.78  | 0.02  | 0.03  |
| <i>Streptococcus peroris</i>          | 0.00  | 0.00  | 0.00  | 0.00  | 0.00 | 0.00 | 9.60  | 2.44  | 0.00 | 0.38 | 0.00 | 0.00 | 0.00 | 0.00 | 0.00 | 0.01 | 0.00  | 0.03  | 0.00  | 0.00  |
| <i>Streptococcus pseudopneumoniae</i> | 0.00  | 0.09  | 0.00  | 0.02  | 0.00 | 0.00 | 25.27 | 44.41 | 0.00 | 8.66 | 0.00 | 0.00 | 0.21 | 1.63 | 3.06 | 5.12 | 1.29  | 1.46  | 75.68 | 70.92 |
| <i>Streptococcus vestibularis</i>     | 0.11  | 0.22  | 63.79 | 56.92 | 0.24 | 0.12 | 15.81 | 22.83 | 4.15 | 5.59 | 1.17 | 1.52 | 0.03 | 0.64 | 0.06 | 3.37 | 45.50 | 42.13 | 0.00  | 0.00  |
| <i>Veillonella dispar</i>             | 0.00  | 0.00  | 0.00  | 0.00  | 0.00 | 0.00 | 0.00  | 2.68  | 0.00 | 0.00 | 0.00 | 0.00 | 9.00 | 0.71 | 0.00 | 0.12 | 12.27 | 18.22 | 0.00  | 0.00  |

**Supplementary table 2:** Relative abundance of bacterial species in whole milk pre-feed (low fat) and whole milk post-feed (high fat) samples.

| Species                                   | 194  |      | 224  |      | 227  |      | 247  |      | 260  |      | 278  |      |
|-------------------------------------------|------|------|------|------|------|------|------|------|------|------|------|------|
|                                           | Pre  | Post | Pre  | Post | Pre  | Post | Pre  | Post | Pre  | Post | Pre  | Post |
| <i>Actinomyces graevenitzii</i>           | 0.0  | 0.0  | 0.0  | 0.0  | 0.0  | 0.0  | 0.0  | 0.0  | 1.8  | 0.0  | 0.0  | 0.0  |
| <i>Anaerococcus lactolyticus</i>          | 0.0  | 9.3  | 0.0  | 0.0  | 0.0  | 0.0  | 0.0  | 0.0  | 0.0  | 0.0  | 0.0  | 0.0  |
| <i>Anaerococcus prevotii</i>              | 4.4  | 0.0  | 0.0  | 0.0  | 0.0  | 0.0  | 0.0  | 0.0  | 0.0  | 0.0  | 0.0  | 0.0  |
| <i>Anaerococcus tetradius</i>             | 82.0 | 0.0  | 0.0  | 0.0  | 0.0  | 0.0  | 0.0  | 0.0  | 0.0  | 0.0  | 0.0  | 0.0  |
| <i>Corynebacterium kroppenstedtii</i>     | 0.0  | 0.0  | 0.0  | 0.0  | 0.0  | 0.0  | 0.0  | 0.0  | 0.0  | 0.0  | 5.0  | 0.0  |
| <i>Corynebacterium renale</i>             | 0.0  | 0.0  | 0.0  | 0.0  | 0.0  | 0.0  | 0.0  | 0.0  | 0.0  | 0.0  | 0.9  | 7.6  |
| <i>Corynebacterium tuberculostearicum</i> | 0.0  | 0.0  | 0.0  | 0.0  | 0.0  | 0.0  | 0.0  | 0.0  | 0.0  | 0.0  | 0.0  | 0.0  |
| <i>Haemophilus parainfluenzae</i>         | 0.0  | 0.0  | 0.0  | 0.0  | 0.0  | 0.0  | 0.2  | 0.0  | 0.0  | 0.0  | 0.0  | 0.0  |
| <i>Massilia timonae</i>                   | 0.0  | 0.0  | 0.0  | 3.2  | 0.0  | 0.0  | 0.0  | 0.0  | 0.0  | 0.0  | 0.0  | 0.0  |
| <i>Pelomonas puraquae</i>                 | 12.4 | 0.8  | 0.0  | 1.7  | 0.0  | 0.0  | 0.1  | 0.0  | 0.6  | 0.2  | 0.0  | 0.0  |
| <i>Peptoniphilus coxii</i>                | 0.0  | 52.4 | 0.0  | 0.0  | 0.0  | 0.0  | 0.0  | 0.0  | 0.0  | 0.0  | 0.0  | 0.0  |
| <i>Propionibacterium acnes</i>            | 0.0  | 0.0  | 0.3  | 12.9 | 0.3  | 0.0  | 0.3  | 0.0  | 0.0  | 0.2  | 0.0  | 0.0  |
| <i>Propionibacterium granulosum</i>       | 0.0  | 0.0  | 0.0  | 0.0  | 0.0  | 0.0  | 0.0  | 0.0  | 0.0  | 2.1  | 0.0  | 0.0  |
| <i>Ralstonia syzygii</i>                  | 0.8  | 0.2  | 0.0  | 0.4  | 0.1  | 0.0  | 0.1  | 0.0  | 0.1  | 0.0  | 0.0  | 0.1  |
| <i>Rothia endophytica</i>                 | 0.0  | 0.0  | 0.0  | 0.0  | 0.0  | 0.0  | 0.0  | 0.0  | 9.9  | 0.0  | 0.0  | 0.0  |
| <i>Rothia mucilaginoso</i>                | 0.0  | 0.0  | 0.0  | 0.0  | 0.8  | 0.0  | 0.0  | 0.0  | 0.1  | 0.0  | 0.4  | 0.3  |
| <i>Staphylococcus capitis</i>             | 0.0  | 0.0  | 0.0  | 0.0  | 0.4  | 0.0  | 0.2  | 0.0  | 0.0  | 0.1  | 0.2  | 0.3  |
| <i>Staphylococcus caprae</i>              | 0.0  | 0.0  | 0.0  | 0.0  | 0.5  | 0.1  | 0.1  | 0.0  | 0.0  | 0.2  | 0.3  | 0.4  |
| <i>Staphylococcus epidermidis</i>         | 0.1  | 36.9 | 0.6  | 0.1  | 79.4 | 99.1 | 94.9 | 0.0  | 84.5 | 92.0 | 78.5 | 37.4 |
| <i>Staphylococcus rostri</i>              | 0.0  | 0.3  | 0.0  | 0.0  | 0.9  | 0.6  | 0.5  | 0.0  | 1.7  | 1.0  | 0.1  | 0.1  |
| <i>Streptococcus lactarius</i>            | 0.0  | 0.0  | 0.0  | 0.3  | 2.4  | 0.2  | 0.0  | 0.0  | 0.0  | 0.1  | 0.0  | 0.0  |
| <i>Streptococcus mitis</i>                | 0.0  | 0.0  | 0.0  | 0.1  | 0.0  | 0.0  | 0.0  | 0.0  | 0.0  | 0.1  | 0.3  | 0.6  |
| <i>Streptococcus parasanguinis</i>        | 0.0  | 0.0  | 0.0  | 10.6 | 0.0  | 0.1  | 0.1  | 0.0  | 1.2  | 1.1  | 0.1  | 0.0  |
| <i>Streptococcus pseudopneumoniae</i>     | 0.0  | 0.0  | 0.0  | 33.9 | 2.7  | 0.0  | 0.0  | 0.0  | 0.1  | 0.7  | 14.1 | 53.1 |
| <i>Streptococcus vestibularis</i>         | 0.1  | 0.1  | 88.5 | 20.5 | 12.5 | 0.0  | 3.5  | 0.0  | 0.1  | 0.4  | 0.0  | 0.0  |
| <i>uncultured bacterium</i>               | 0.0  | 0.0  | 0.0  | 1.8  | 0.0  | 0.0  | 0.0  | 0.0  | 0.0  | 0.0  | 0.0  | 0.0  |
| <i>uncultured soil bacterium</i>          | 0.0  | 0.0  | 0.0  | 12.9 | 0.0  | 0.0  | 0.0  | 0.0  | 0.0  | 0.0  | 0.0  | 0.0  |
| <i>Veillonella dispar</i>                 | 0.0  | 0.0  | 10.5 | 0.0  | 0.0  | 0.0  | 0.0  | 0.0  | 0.0  | 1.6  | 0.0  | 0.0  |

|                              |     |     |     |     |     |     |     |     |     |     |     |     |
|------------------------------|-----|-----|-----|-----|-----|-----|-----|-----|-----|-----|-----|-----|
| <i>Wautersiella falsenii</i> | 0.0 | 0.0 | 0.0 | 1.8 | 0.0 | 0.0 | 0.0 | 0.0 | 0.0 | 0.0 | 0.0 | 0.0 |
|------------------------------|-----|-----|-----|-----|-----|-----|-----|-----|-----|-----|-----|-----|
